# Supplementary material for: Incidence of Revision Surgery After Decompression With vs Without Fusion Among Patients With Degenerative Lumbar Spinal Stenosis
Source: PubMed Central journal article supplement (PMC9327572; doi:10.1001/jamanetworkopen.2022.23803), 2022-07-26
Supplement: jamanetwopen-e2223803-s002.pdf [file jamanetwopen-e2223803-s002.pdf]

Supplemental Online Content: Nonauthor Collaborators

\*First name, last name, and suffix (if applicable) are required and will appear in PubMed.

| <b>*Group Name(s): Lumbar Stenosis Outcome Study Group</b> |                   |                              |                  |                                       |                                          |                                                         |                                                                                            |
|------------------------------------------------------------|-------------------|------------------------------|------------------|---------------------------------------|------------------------------------------|---------------------------------------------------------|--------------------------------------------------------------------------------------------|
| <b>*First Name and Middle Initial(s)</b>                   | <b>*Last Name</b> | <b>*Suffix (eg, Jr, III)</b> | Academic Degrees | Institution                           | Location (city, state/province, country) | Role or Contribution, eg, chair, principal investigator | Group (if more than 1 Group listed in the byline) and/or Subgroup (eg, Steering Committee) |
| Florian                                                    | Brunner           |                              | Prof             | University Hospital Balgrist          | Zurich, ZH, Switzerland                  | collaborator                                            | LSOS                                                                                       |
| Sebastian                                                  | Winklhofer        |                              | Dr               | University Hospital Zurich, Radiology | Zurich, ZH, Switzerland                  | collaborator                                            | LSOS                                                                                       |
| Roman                                                      | Guggenberger      |                              | Prof             | University Hospital Zurich, Radiology | Zurich, ZH, Switzerland                  | collaborator                                            | LSOS                                                                                       |
| Jürg                                                       | Hodler            |                              | Prof             | University Hospital Zurich, Radiology | Zurich, ZH, Switzerland                  | Chair                                                   | Steering Committee, LSOS                                                                   |
| Joachim                                                    | Oberle            |                              | Dr               | Cantonal Hospital Winterthur          | Winterthur, ZH, Switzerland              | collaborator                                            | LSOS                                                                                       |
| Urs                                                        | Schmid            |                              | Prof             | Triemli Hospital Zurich, Neurosurgery | Zurich, ZH, Switzerland                  | collaborator                                            | LSOS                                                                                       |
| Min                                                        | Kan               |                              | Prof             | Hirslanden Klinik im Park             | Zurich, ZH, Switzerland                  | collaborator                                            | LSOS                                                                                       |
